# Supplementary material
Source: publisher figshare collection journal article supplement (https://tandf.figshare.com/ndownloader/files/16910585)
Supplement: Supplementary file 1 [file 16910585]

Supplementary Figure S1. Weather conditions during growing period in Tsukuba, Fukuyama and Nagano. A: Mean air temperature, B: Solar radiation.

Supplementary Table S1. Grain yield and its yield components of Oonari and Takanari in Tsukuba

**P* < 0.05, ***P* < 0.01, ****P* < 0.001 (ANOVA). n.s., not significant.

Supplementary Table S2. Grain yield and its yield components of Oonari and Takanari in Fukuyama

**P* < 0.05, ***P* < 0.01, ****P* < 0.001 (ANOVA). n.s., not significant.

Supplementary Table S3. Pearson’s simple correlation (*r*) analysis between weather condition and yield trait of Oonari.

**P* < 0.05
